## Author Correction

### Association of the tetraspanin CD151 with the laminin-binding integrins $\alpha 3\beta 1$ , $\alpha 6\beta 1$ , $\alpha 6\beta 4$ and $\alpha 7\beta 1$ in cells in culture and in vivo

Sterk, L. M. T., Geuijen, C. A. W., van den Berg, J. G., Claessen, N., Weening, J. J. and Sonnenberg, A. *J. Cell Sci.* **115**, 1161-1173.

In the printed version of this article, Fig. 10 was incorrect. The correct figure is shown below.

**Fig. 10.** Expression of laminin-binding integrins on transfected K562 cells increases CD151 cell surface expression. Flow cytometric analysis of wild-type K562 cells endogenously expressing  $\alpha 5\beta 1$  and transfected K562 also expressing  $\alpha v\beta 1$ ,  $\alpha 3\beta 1$ ,  $\alpha 6\beta 1$ ,  $\alpha 6\beta 4$ ,  $\alpha 7X1\beta 1$  or  $\alpha 7X2\beta 1$ . Solid lines in the left panels indicate staining with anti-integrin antibodies: anti- $\alpha 5$  mAb Sam-1 (K562 cells), anti- $\alpha v$  mAb 13C2 (K562- $\alpha v$ ), anti- $\alpha 3$  mAb J143 (K562- $\alpha 3$ ), anti- $\alpha 6$  mAb GoH3 (K562- $\alpha 6$ ), anti- $\beta 4$  mAb 439-9B (K562- $\alpha 6\beta 4$ ) and anti- $\alpha 7$  mAb CA25 (K562- $\alpha 7BX1$  and K562- $\alpha 7BX2$ ). Staining of cells with anti-CD151 antibodies is shown in the right panels. Solid lines represent staining of cells with mAb TS151R and broken lines with mAb P48. A negative control (dotted line) with secondary goat anti-mouse or rat IgG alone is shown in each panel. R represents the ratio of the mean fluorescence intensity of cells stained with mAb P48 and with secondary antibody alone. A three- to sixfold increase of CD151 expression is observed in transfected cells that ectopically express laminin-binding integrins. The TS151R epitope is masked in all cells expressing one of the laminin-binding integrins.

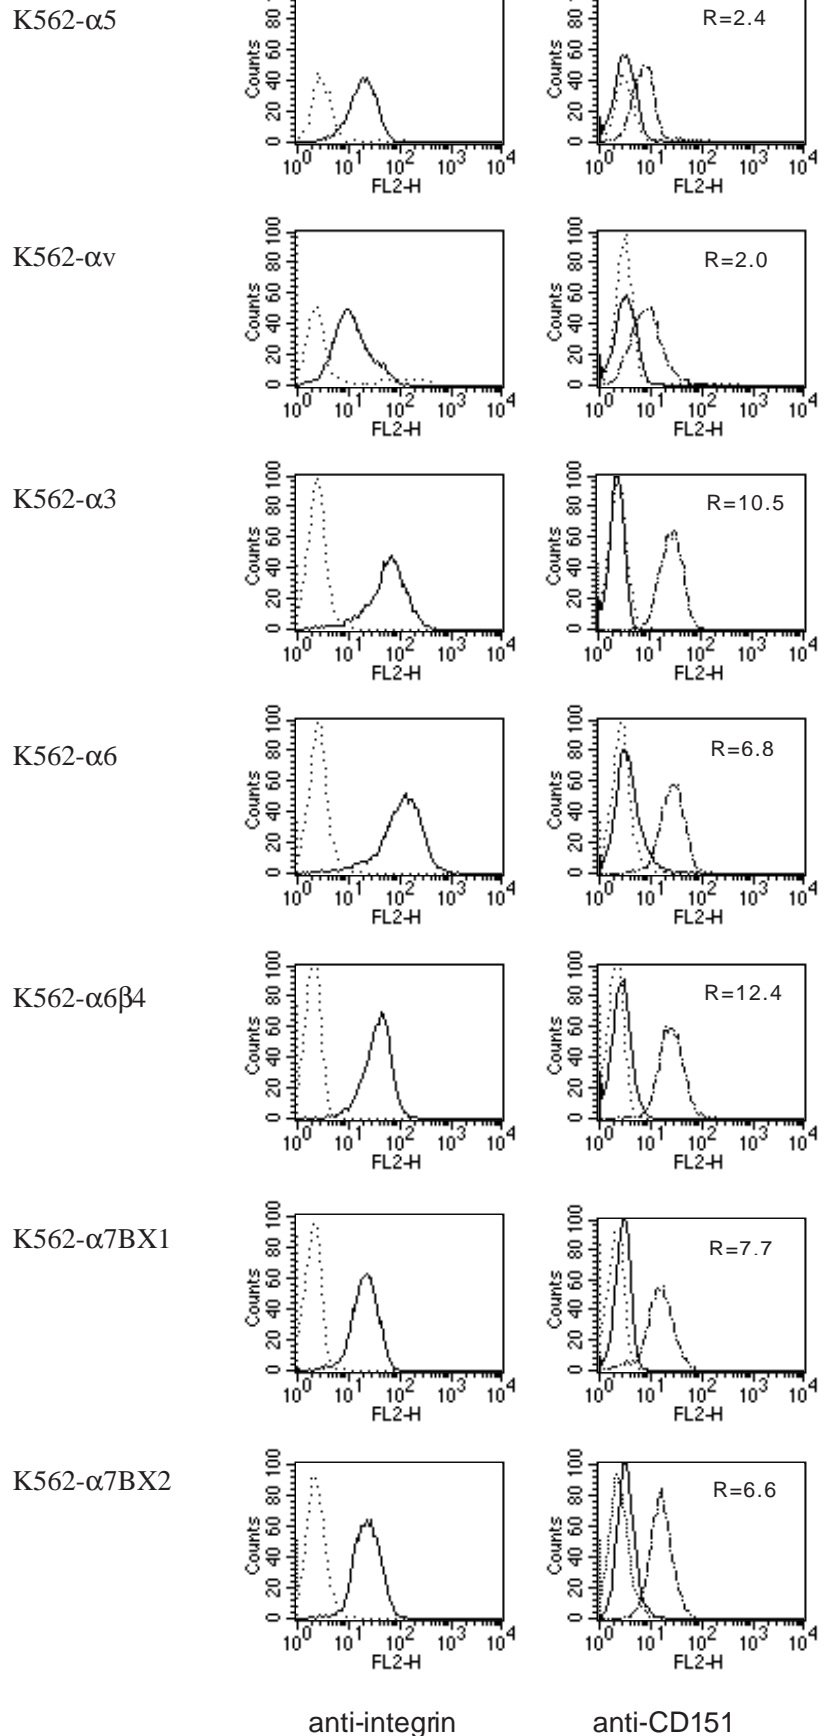

Source: https://cob.silverchair.com/jcs/article-pdf/115/12/2615/1591813/2615.pdf
